# Supplementary material for: Visually integrating and exploring high throughput Phenome-Wide Association Study (PheWAS) results using PheWAS-View
Source: Springer Nature journal article supplement (doi:10.1186/1756-0381-5-5), 2012-06-08

7A

## PheWAS

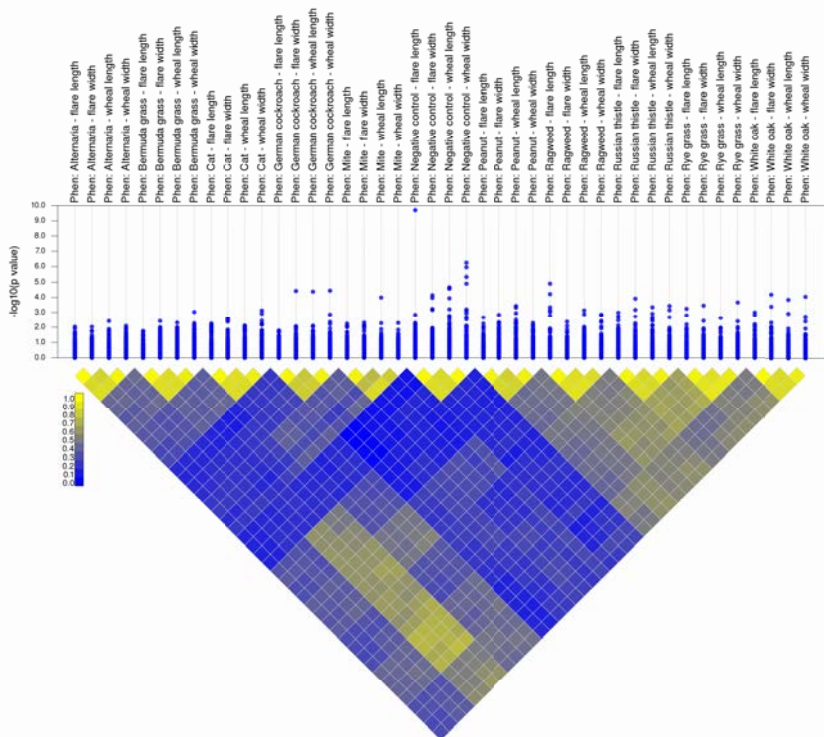

7B

## PheWAS

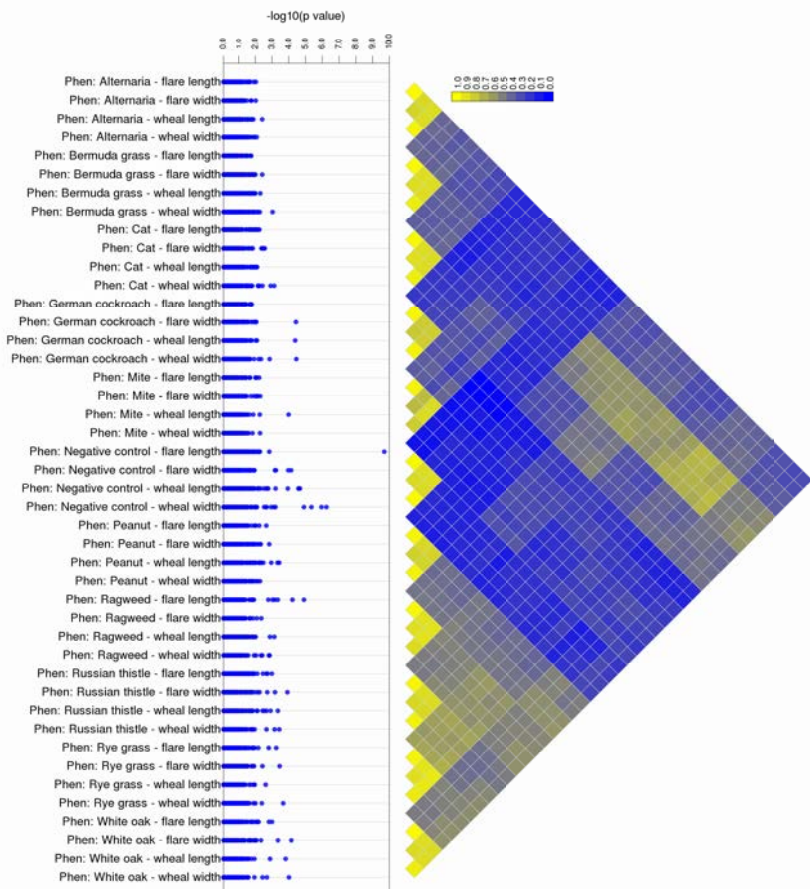

Supplement: 13040_2012_63_MOESM13_ESM.pdf [file 13040_2012_63_MOESM13_ESM.pdf]
